# Supplementary material for: Feldspathic sandstone as an emerging soil stabilizer for aeolian sand in the Mu Us Sandy Land: insights into particle size distribution
Source: PeerJ. 2024 Nov 25;12:e18577. doi: 10.7717/peerj.18577 (PMC11604038; doi:10.7717/peerj.18577)
Supplement: Data S1 [file peerj-12-18577-s001.xlsx]

## Sheet: Sheet1
particle size range/mm	Mass fraction/%											Particle size/mm	Frequency/%						Particle size/mm	Cumulative mass fraction/%
	mf:ms=1:1		mf:ms=1:2		mf:ms=1:5		mf:ms=1:0		mf:ms=0:1
	mean	sd	mean	sd	mean	sd	mean	sd	mean	sd			mf:ms=1:0	mf:ms=1:1	mf:ms=1:2	mf:ms=1:5	mf:ms=0:1			mf:ms=1:0	mf:ms=1:1	mf:ms=1:2	mf:ms=1:5	mf:ms=0:1
<0.001	5.1318	0.2753	3.9366	0.1998	2.398	0.2606	6.512	0.6368	0.0583	0.0922		2.244e-05	0	0	0	0	0		2.244e-05	0	0	0	0	0
0.001-0.002	5.9231	0.1677	4.4397	0.2433	2.5262	0.2248	7.7493	0.7637	0.1559	0.1371		2.5179e-05	0	0	0	0	0		2.5179e-05	0	0	0	0	0
0.002-0.005	11.6329	0.3008	8.8921	0.6963	5.2878	0.3967	17.3229	1.508	0.4861	0.3088		2.8251e-05	0	0	0	0	0		2.8251e-05	0	0	0	0	0
0.005-0.01	10.917	0.5549	8.694	0.8244	5.2467	0.3866	16.7199	1.4531	0.5382	0.3486		3.1698e-05	0	0	0	0	0		3.1698e-05	0	0	0	0	0
0.01-0.05	26.8246	1.234	21.2957	2.4554	11.9959	0.8558	41.2681	3.2174	3.0272	1.5753		3.5566e-05	0	0	0	0	0		3.5566e-05	0	0	0	0	0
0.05-0.25	14.0237	3.0337	13.8169	1.4348	17.0698	1.5843	9.7723	5.0737	31.4184	4.6678		3.9905e-05	0	0	0	0	0		3.9905e-05	0	0	0	0	0
0.25-1	25.547	3.3051	38.6521	2.2952	55.4756	1.6961	0.6555	1.2463	60.3726	5.1798		4.4774e-05	0	0	0	0	0		4.4774e-05	0	0	0	0	0
1-2	0	0	0.2729	0.4614	0	0	0	0	3.9433	7.656		5.0238e-05	0	0	0	0	0		5.0238e-05	0	0	0	0	0
												5.6368e-05	0	0	0	0	0		5.6368e-05	0	0	0	0	0
												6.3246e-05	0	0	0	0	0		6.3246e-05	0	0	0	0	0
												7.0963e-05	0	0	0	0	0		7.0963e-05	0	0	0	0	0
												8.9337e-05	0	0	0	0	0		8.9337e-05	0	0	0	0	0
												0.00010024	0	0	0	0	0		0.00010024	0	0	0	0	0
												0.00011247	0	0	0	0	0		0.00011247	0	0	0	0	0
												0.00012619	0	0	0	0	0		0.00012619	0	0	0	0	0
												0.00014159	0	0	0	0	0		0.00014159	0	0	0	0	0
												0.00015887	0	0	0	0	0		0.00015887	0	0	0	0	0
												0.00017825	0	0	0	0	0		0.00017825	0	0	0	0	0
												0.0002	0	0	0	0	0		0.0002	0	0	0	0	0
												0.0002244	0	0	0	0	0		0.0002244	0	0	0	0	0
												0.00025179	0	0	0	0	0		0.00025179	0	0	0	0	0
												0.00028251	0	0	0	0	0		0.00028251	0	0	0	0	0
												0.00031698	0.0014568	0	0	0	0		0.00031698	0.0014568	0	0	0	0
												0.00035566	0.0142	0	0	0	0		0.00035566	0.0157	0	0	0	0
												0.00039905	0.1758	0.000435	0	0	0		0.00039905	0.1915	0.000435	0	0	0
												0.00044774	0.3728	0.1537	0.1321	0.089	0		0.00044774	0.5644	0.1541	0.1321	0.089	0
												0.00050238	0.5225	0.3211	0.2169	0.1421	0		0.00050238	1.0869	0.4752	0.349	0.2311	0
												0.00056368	0.6786	0.4232	0.3374	0.2135	8.8125e-06		0.00056368	1.7655	0.8985	0.6863	0.4446	8.8125e-06
												0.00063246	0.8063	0.5392	0.4121	0.2566	0.0041433		0.00063246	2.5719	1.4377	1.0985	0.7012	0.0041521
												0.00070963	0.9039	0.6305	0.4857	0.2979	0.0105		0.00070963	3.4757	2.0682	1.5842	0.9992	0.0147
												0.00079621	0.9757	0.7016	0.5416	0.328	0.0152		0.00079621	4.4515	2.7698	2.1259	1.3272	0.0298
												0.00089337	1.0239	0.7566	0.5822	0.3484	0.0145		0.00089337	5.4754	3.5263	2.708	1.6756	0.0443
												0.0010024	1.0588	0.796	0.6107	0.3612	0.0143		0.0010024	6.5341	4.3223	3.3188	2.0368	0.0586
												0.0011247	1.0924	0.8267	0.631	0.3689	0.0166		0.0011247	7.6265	5.149	3.9498	2.4057	0.0752
												0.0012619	1.1371	0.8558	0.6492	0.3753	0.0202		0.0012619	8.7637	6.0048	4.5989	2.7809	0.0954
												0.0014159	1.2051	0.8902	0.671	0.384	0.0235		0.0014159	9.9688	6.895	5.2699	3.165	0.1189
												0.0015887	1.3	0.9369	0.7023	0.3988	0.0283		0.0015887	11.2688	7.8319	5.9722	3.5638	0.1473
												0.0017825	1.4246	0.9972	0.7446	0.421	0.0305		0.0017825	12.6934	8.8292	6.7168	3.9849	0.1777
												0.002	1.5679	1.072	0.7991	0.4516	0.0366		0.002	14.2613	9.9011	7.5159	4.4364	0.2143
												0.002244	1.7218	1.1537	0.8605	0.4878	0.0469		0.002244	15.9832	11.0549	8.3763	4.9243	0.2612
												0.0025179	1.8749	1.2374	0.9251	0.5279	0.0503		0.0025179	17.8581	12.2923	9.3014	5.4521	0.3115
												0.0028251	2.0193	1.3165	0.9881	0.5691	0.0552		0.0028251	19.8774	13.6087	10.2895	6.0212	0.3667
												0.0031698	2.1532	1.3877	1.0469	0.6098	0.0596		0.0031698	22.0306	14.9964	11.3364	6.6311	0.4263
												0.0035566	2.2709	1.4512	1.1019	0.65	0.0639		0.0035566	24.3015	16.4477	12.4383	7.2811	0.4902
												0.0039905	2.3761	1.5061	1.1517	0.6881	0.0677		0.0039905	26.6776	17.9538	13.59	7.9692	0.5579
												0.0044774	2.4663	1.5559	1.1992	0.725	0.0711		0.0044774	29.1439	19.5096	14.7892	8.6942	0.629
												0.0050238	2.5466	1.6011	1.2441	0.7593	0.0745		0.0050238	31.6905	21.1108	16.0333	9.4535	0.7035
												0.0056368	2.6179	1.6456	1.289	0.7918	0.078		0.0056368	34.3084	22.7564	17.3223	10.2452	0.7815
												0.0063246	2.6839	1.6906	1.3341	0.8213	0.0819		0.0063246	36.9922	24.447	18.6564	11.0665	0.8633
												0.0070963	2.7475	1.7378	1.3799	0.8477	0.0864		0.0070963	39.7397	26.1848	20.0363	11.9142	0.9497
												0.0079621	2.8101	1.7878	1.426	0.8702	0.0915		0.0079621	42.5498	27.9726	21.4623	12.7844	1.0412
												0.0089337	2.8751	1.8393	1.4705	0.8877	0.0971		0.0089337	45.425	29.8119	22.9329	13.6721	1.1383
												0.01	2.9405	1.8919	1.5128	0.8998	0.1025		0.01	48.3655	31.7038	24.4456	14.5718	1.2408
												0.0112	3.0076	1.9415	1.549	0.9055	0.1072		0.0112	51.3731	33.6453	25.9947	15.4774	1.348
												0.0126	3.0713	1.9867	1.5784	0.9046	0.1174		0.0126	54.4444	35.632	27.5731	16.382	1.4654
												0.0142	3.1282	2.0225	1.5981	0.8969	0.127		0.0142	57.5726	37.6545	29.1712	17.2789	1.5925
												0.0159	3.1724	2.0465	1.6072	0.8828	0.1321		0.0159	60.745	39.701	30.7784	18.1617	1.7246
												0.0178	3.1984	2.0564	1.6058	0.8638	0.1365		0.0178	63.9434	41.7574	32.3842	19.0255	1.861
												0.02	3.2016	2.0514	1.5952	0.8424	0.1418		0.02	67.145	43.8088	33.9794	19.8679	2.0028
												0.0224	3.1787	2.0324	1.5775	0.8216	0.1504		0.0224	70.3236	45.8412	35.5569	20.6896	2.1532
												0.0252	3.1271	2.0024	1.5565	0.8062	0.1662		0.0252	73.4507	47.8436	37.1134	21.4958	2.3194
												0.0283	3.0487	1.9634	1.5341	0.7995	0.1917		0.0283	76.4994	49.807	38.6475	22.2952	2.511
												0.0317	2.943	1.9197	1.5132	0.8047	0.2302		0.0317	79.4423	51.7267	40.1608	23.0999	2.7412
												0.0356	2.8128	1.872	1.4935	0.8228	0.2823		0.0356	82.2551	53.5987	41.6542	23.9227	3.0235
												0.0399	2.6582	1.8209	1.4725	0.8513	0.3466		0.0399	84.9133	55.4196	43.1268	24.774	3.3701
												0.0448	2.4771	1.764	1.445	0.8841	0.4205		0.0448	87.3904	57.1836	44.5718	25.6581	3.7907
												0.0502	2.2717	1.6964	1.4027	0.912	0.4968		0.0502	89.6621	58.88	45.9745	26.5701	4.2875
												0.0564	2.0286	1.6142	1.3373	0.9223	0.5714		0.0564	91.6907	60.4943	47.3118	27.4925	4.8589
												0.0632	1.7674	1.5085	1.2368	0.9016	0.6369		0.0632	93.4581	62.0027	48.5486	28.3941	5.4958
												0.071	1.4628	1.3795	1.1	0.8409	0.6955		0.071	94.9208	63.3822	49.6486	29.2349	6.1913
												0.0796	1.1361	1.2224	0.9226	0.7345	0.7528		0.0796	96.057	64.6046	50.5712	29.9695	6.9441
												0.0893	0.8955	1.0455	0.7182	0.5913	0.8273		0.0893	96.9524	65.6501	51.2893	30.5608	7.7714
												0.1002	0.6551	0.8574	0.5042	0.4306	0.948		0.1002	97.6075	66.5075	51.7935	30.9913	8.7195
												0.1125	0.455	0.6764	0.3115	0.2845	1.15		0.1125	98.0625	67.1839	52.1051	31.2758	9.8695
												0.1262	0.2951	0.5264	0.177	0.1976	1.481		0.1262	98.3576	67.7103	52.2821	31.4734	11.3505
												0.1416	0.2466	0.4322	0.1354	0.2222	1.9675		0.1416	98.6043	68.1425	52.4175	31.6956	13.3179
												0.1589	0.208	0.4242	0.2159	0.4036	2.6492		0.1589	98.8123	68.5667	52.6334	32.0992	15.9672
												0.1783	0.1737	0.5267	0.4806	0.8065	3.4992		0.1783	98.986	69.0933	53.114	32.9057	19.4664
												0.2	0.1435	0.7513	0.9458	1.4538	4.5012		0.2	99.1295	69.8446	54.0597	34.3595	23.9676
												0.2244	0.1193	1.1038	1.5995	2.3584	5.5648		0.2244	99.2488	70.9484	55.6593	36.7179	29.5324
												0.2518	0.1016	1.5622	2.3922	3.4618	6.5834		0.2518	99.3504	72.5106	58.0515	40.1797	36.1158
												0.2825	0.0904	2.0856	3.2466	4.6649	7.4396		0.2825	99.4407	74.5962	61.298	44.8446	43.5554
												0.317	0.0851	2.6212	4.0715	5.8427	7.9953		0.317	99.5258	77.2174	65.3695	50.6873	51.5507
												0.3557	0.0843	3.0888	4.7436	6.8168	8.1641		0.3557	99.6102	80.3062	70.1131	57.5041	59.7148
												0.3991	0.0855	3.4297	5.1803	7.4621	7.8989		0.3991	99.6957	83.7358	75.2934	64.9662	67.6136
												0.4477	0.0855	3.5712	5.2957	7.6471	7.2222		0.4477	99.7812	87.307	80.589	72.6134	74.8358
												0.5024	0.081	3.4859	5.0729	7.3384	6.2277		0.5024	99.8622	90.7929	85.662	79.9518	81.0635
												0.5637	0.0691	3.1644	4.5339	6.5678	5.0356		0.5637	99.9313	93.9572	90.1958	86.5196	86.0991
												0.6325	0.0489	2.6269	3.741	5.4357	3.8356		0.6325	99.9802	96.5842	93.9368	91.9552	89.9347
												0.7096	0.0198	1.9394	2.8022	4.0339	2.6253		0.7096	100	98.5236	96.739	95.9891	92.5599
												0.7962	0	1.1319	1.8021	2.6891	1.5528		0.7962	100	99.6555	98.5412	98.6782	94.1128
												0.8934	0	0.3378	0.8591	1.2838	1.0142		0.8934	100	99.9933	99.4002	99.962	95.1269
												1.0024	0	0.006662	0.2559	0.038	0.9491		1.0024	100	100	99.6561	100	96.076
												1.1247	0	0	0.0725	0	0.9177		1.1247	100	100	99.7287	100	96.9937
												1.2619	0	0	0.0715	0	0.8642		1.2619	100	100	99.8001	100	97.8579
												1.4159	0	0	0.0517	0	0.7747		1.4159	100	100	99.8518	100	98.6326
												1.5887	0	0	0.049	0	0.6481		1.5887	100	100	99.9009	100	99.2806
												1.7825	0	0	0.0436	0	0.4502		1.7825	100	100	99.9444	100	99.7308
												2	0	0	0.0342	0	0.2692		2	100	100	99.9786	100	100
														0	0.0214	0				100	100	100	100
